# Supplementary material for: Qualitative study exploring the feasibility, usability and acceptability of neonatal continuous monitoring technologies at a public tertiary hospital in Nairobi, Kenya
Source: HighWire-hosted journal article supplement (doi:10.1136/bmjopen-2021-053486), 2022-01-01
Supplement: bmjopen-2021-053486supp002_data_supplement.pdf [file bmjopen-2021-053486supp002_data_supplement.pdf]

## S3 File Healthcare Provider (HCP) Direct Observation Guide

|                                                                                                                                                                                                                                                                                                                                                                                                                                                                                                                                                                                                                                                                                                                  |
|------------------------------------------------------------------------------------------------------------------------------------------------------------------------------------------------------------------------------------------------------------------------------------------------------------------------------------------------------------------------------------------------------------------------------------------------------------------------------------------------------------------------------------------------------------------------------------------------------------------------------------------------------------------------------------------------------------------|
| <b>A. Administrative information</b>                                                                                                                                                                                                                                                                                                                                                                                                                                                                                                                                                                                                                                                                             |
| <b>HCP ID number:</b>                                                                                                                                                                                                                                                                                                                                                                                                                                                                                                                                                                                                                                                                                            |
| <b>Date HCP informed consent form (ICF) signed:</b>  D D  -  M M  -  Y Y Y Y                                                                                                                                                                                                                                                                                                                                                                                                                                                                                                                                                                                                                                     |
| <b>HCP ICF signed prior to any observation?</b> <input type="checkbox"/> Yes <input type="checkbox"/> No<br>If no, please do not make any observations until the ICF has been completed.                                                                                                                                                                                                                                                                                                                                                                                                                                                                                                                         |
| <b>Name of observer:</b>                                                                                                                                                                                                                                                                                                                                                                                                                                                                                                                                                                                                                                                                                         |
| <b>Neonate ID number:</b>                                                                                                                                                                                                                                                                                                                                                                                                                                                                                                                                                                                                                                                                                        |
| <b>Date of observation:</b>  D D  -  M M  -  Y Y Y Y                                                                                                                                                                                                                                                                                                                                                                                                                                                                                                                                                                                                                                                             |
| <b>Location of observation:</b><br><input type="checkbox"/> Aga Khan University Hospital – Nairobi<br><input type="checkbox"/> Pumwani Maternity Hospital                                                                                                                                                                                                                                                                                                                                                                                                                                                                                                                                                        |
| <b>Observation start time:</b>  H H  :  M M  <i>military time</i><br>(Time HCP began device preparation)                                                                                                                                                                                                                                                                                                                                                                                                                                                                                                                                                                                                         |
| <b>There are three different phases that can be observed and reported in the fields below:</b><br>1. Device preparation and initial application: observing HCP prepare and place device on neonate.<br>2. Ongoing device monitoring and troubleshooting: observing HCP perform regular checks of device placement on neonate (and repositioning if necessary) and data quality, including troubleshooting.<br>3. Device disconnection, removal, and cleaning: observing HCP remove device from neonate, clean and store.                                                                                                                                                                                         |
| <b><u>Instructions for qualitative research staff:</u></b><br>Use this document as a guide to conduct observations of one HCP during one or more of the phases described above. Indicate in checklist below which phase(s) were included in this observation session.<br><b>Use a new form for each HCP.</b> Two different HCP should not be included on the same form. <b>Use a new form for each neonate and for each observation session day.</b> Two different neonates should not be included on the same form. Two different observation session days should not be included on the same form. Multiple observations of the same neonate by the same HCP on the same day can be included on the same form. |
| Record observations. All observations must be kept confidential. Do not discuss or share observations with anyone outside of the ETNA study team.                                                                                                                                                                                                                                                                                                                                                                                                                                                                                                                                                                |

| <b>B. Phase(s) observed during this session on the same neonate on the same day (check all that apply)</b>                                                                                                           |                              |                             |
|----------------------------------------------------------------------------------------------------------------------------------------------------------------------------------------------------------------------|------------------------------|-----------------------------|
| <input type="checkbox"/> Device preparation and initial application<br><input type="checkbox"/> Ongoing device monitoring and troubleshooting<br><input type="checkbox"/> Device disconnection, removal and cleaning |                              |                             |
| <b>C. Which devices did the HCP use during today's observation?</b>                                                                                                                                                  |                              |                             |
| EarlySense InSight investigational device                                                                                                                                                                            | <input type="checkbox"/> Yes | <input type="checkbox"/> No |
| Sibel ANNE investigational device                                                                                                                                                                                    | <input type="checkbox"/> Yes | <input type="checkbox"/> No |
| Masimo Rad-97 reference device                                                                                                                                                                                       | <input type="checkbox"/> Yes | <input type="checkbox"/> No |

| <b>D. PHASE 1: Device initial application</b>                                                                                                                                                                                                                                                                                                                                                                                                                                                                                                                                                                                                                                                                                                                                                                                                           |
|---------------------------------------------------------------------------------------------------------------------------------------------------------------------------------------------------------------------------------------------------------------------------------------------------------------------------------------------------------------------------------------------------------------------------------------------------------------------------------------------------------------------------------------------------------------------------------------------------------------------------------------------------------------------------------------------------------------------------------------------------------------------------------------------------------------------------------------------------------|
| <b>EarlySense InSight investigational device</b> (if device not used, skip to next section)                                                                                                                                                                                                                                                                                                                                                                                                                                                                                                                                                                                                                                                                                                                                                             |
| Application start time:  H H  :  M M  military time<br>Application end time:  H H  :  M M  military time<br><input type="checkbox"/> Did not complete device preparation and initial application                                                                                                                                                                                                                                                                                                                                                                                                                                                                                                                                                                                                                                                        |
| Please check those steps that you observed. Comments and observations can be made below.<br><br><b>Preparation</b> <ul style="list-style-type: none"> <li><input type="checkbox"/> Remove neonate from bed/bassinet</li> <li><input type="checkbox"/> Place pad under neonate's mattress</li> <li><input type="checkbox"/> Gently place neonate back on bed/bassinet with chest above middle of pad</li> <li><input type="checkbox"/> Attach pad cord to InSight device</li> <li><input type="checkbox"/> Confirm InSight device is seen on EarlySense laptop/CDS</li> </ul> <b>Admission</b> <ul style="list-style-type: none"> <li><input type="checkbox"/> Correct name of admitting nurse selected in EarlySense laptop/CDS</li> <li><input type="checkbox"/> Enter PTID into EarlySense laptop/CDS admit patient screen in MRN (ID) box</li> </ul> |
| Please provide comments if HCP <u>did not complete</u> device preparation and initial application. Also, if HCP was not able to complete steps correctly, what did they do instead?                                                                                                                                                                                                                                                                                                                                                                                                                                                                                                                                                                                                                                                                     |

|                                                                                                                                                                                                                                                                                                                                                                                                                                                                                                                                                                                                                                                                                                                                                                                                                                                                                                                                                                                                                                                                                                                                                                                                                                                                                                                                                                                                                                                                                                      |
|------------------------------------------------------------------------------------------------------------------------------------------------------------------------------------------------------------------------------------------------------------------------------------------------------------------------------------------------------------------------------------------------------------------------------------------------------------------------------------------------------------------------------------------------------------------------------------------------------------------------------------------------------------------------------------------------------------------------------------------------------------------------------------------------------------------------------------------------------------------------------------------------------------------------------------------------------------------------------------------------------------------------------------------------------------------------------------------------------------------------------------------------------------------------------------------------------------------------------------------------------------------------------------------------------------------------------------------------------------------------------------------------------------------------------------------------------------------------------------------------------|
| Did you observe HCP have any challenges or difficulties preparing and/or applying device? What were the problems and how were they resolved?                                                                                                                                                                                                                                                                                                                                                                                                                                                                                                                                                                                                                                                                                                                                                                                                                                                                                                                                                                                                                                                                                                                                                                                                                                                                                                                                                         |
| Did HCP require any assistance when preparing and/or applying device?<br><input type="checkbox"/> Yes <input type="checkbox"/> No<br>If yes, who assisted HCP?<br>If yes, what kind of assistance was required?                                                                                                                                                                                                                                                                                                                                                                                                                                                                                                                                                                                                                                                                                                                                                                                                                                                                                                                                                                                                                                                                                                                                                                                                                                                                                      |
| Did you observe any risky situations where mistakes could potentially happen, such as times when HCP almost made a mistake? If yes, please explain.                                                                                                                                                                                                                                                                                                                                                                                                                                                                                                                                                                                                                                                                                                                                                                                                                                                                                                                                                                                                                                                                                                                                                                                                                                                                                                                                                  |
| Did HCP make any other comments to you or their colleagues related to preparing and/or applying device? If yes, record comments verbatim and provide context as necessary.                                                                                                                                                                                                                                                                                                                                                                                                                                                                                                                                                                                                                                                                                                                                                                                                                                                                                                                                                                                                                                                                                                                                                                                                                                                                                                                           |
| <b>Sibel ANNE investigational device</b> (if device not used, skip to next section)                                                                                                                                                                                                                                                                                                                                                                                                                                                                                                                                                                                                                                                                                                                                                                                                                                                                                                                                                                                                                                                                                                                                                                                                                                                                                                                                                                                                                  |
| Application start time:  H H  :  M M  military time<br>Application end time:  H H  :  M M  military time<br><input type="checkbox"/> Did not complete device preparation and initial application                                                                                                                                                                                                                                                                                                                                                                                                                                                                                                                                                                                                                                                                                                                                                                                                                                                                                                                                                                                                                                                                                                                                                                                                                                                                                                     |
| Please check those steps that you observed. Comments and observations can be made below.<br><b>Preparation for data collection</b><br><input type="checkbox"/> ANNE Connect application opened immediately after Sibel iPad unlocked<br><input type="checkbox"/> Participant ID entered to start data collection session<br><input type="checkbox"/> Correct chest and limb sensors selected from within ANNE Connect app<br><b>Application of ANNE chest sensor</b><br><input type="checkbox"/> Open new hydrogel package and apply hydrogel adhesive to chest sensor or neonate's chest, with gentle but firm pressure<br><input type="checkbox"/> Place chest sensor on the torso of the neonate and apply gentle but firm pressure to secure sensor to hydrogel adhesive<br><b>Application of ANNE limb sensor</b><br><input type="checkbox"/> Insert limb sensor into Velcro strap holes Apply LED to bottom of neonate's foot<br><input type="checkbox"/> Apply limb sensor on neonate's foot with LED to bottom of neonate's foot Check that photodiode is aligned with LED<br><input type="checkbox"/> Confirm proper limb sensor placement by checking ANNE Connect application to verify that an error message is not displayed<br><b>Confirmation of data collection</b><br><input type="checkbox"/> Correctly close ANNE Connect application (without disconnecting within Connect app)<br><input type="checkbox"/> Open ANNE Stream application to check quality of vital signs signals |
| Please provide comments if HCP <u>did not complete</u> device preparation and initial application. Also, if HCP was not able to complete steps correctly and <b>in order</b> , what did they do instead?                                                                                                                                                                                                                                                                                                                                                                                                                                                                                                                                                                                                                                                                                                                                                                                                                                                                                                                                                                                                                                                                                                                                                                                                                                                                                             |
| Did you observe HCP have any challenges or difficulties preparing and/or applying device? What were the problems and how were they resolved?                                                                                                                                                                                                                                                                                                                                                                                                                                                                                                                                                                                                                                                                                                                                                                                                                                                                                                                                                                                                                                                                                                                                                                                                                                                                                                                                                         |
| Did HCP require any assistance when preparing and/or applying device?<br><input type="checkbox"/> Yes <input type="checkbox"/> No<br>If yes, who assisted HCP?<br>If yes, what kind of assistance was required?                                                                                                                                                                                                                                                                                                                                                                                                                                                                                                                                                                                                                                                                                                                                                                                                                                                                                                                                                                                                                                                                                                                                                                                                                                                                                      |
| Did you observe any risky situations where mistakes could potentially happen, such as times when HCP almost made a mistake? If yes, please explain.                                                                                                                                                                                                                                                                                                                                                                                                                                                                                                                                                                                                                                                                                                                                                                                                                                                                                                                                                                                                                                                                                                                                                                                                                                                                                                                                                  |

|                                                                                                                                                                                                                                                                                                                                                                                                                                                                                                                                                                                                                                                                                                                                                                                                                                                                                                                                                                                                                                                                                                                      |          |            |          |
|----------------------------------------------------------------------------------------------------------------------------------------------------------------------------------------------------------------------------------------------------------------------------------------------------------------------------------------------------------------------------------------------------------------------------------------------------------------------------------------------------------------------------------------------------------------------------------------------------------------------------------------------------------------------------------------------------------------------------------------------------------------------------------------------------------------------------------------------------------------------------------------------------------------------------------------------------------------------------------------------------------------------------------------------------------------------------------------------------------------------|----------|------------|----------|
| Did HCP make any other comments to you or their colleagues related to preparing and/or applying device? If yes, record comments verbatim and provide context as necessary.                                                                                                                                                                                                                                                                                                                                                                                                                                                                                                                                                                                                                                                                                                                                                                                                                                                                                                                                           |          |            |          |
| <b>Masimo Rad-97 reference device</b> (if device not used, skip to next section)                                                                                                                                                                                                                                                                                                                                                                                                                                                                                                                                                                                                                                                                                                                                                                                                                                                                                                                                                                                                                                     |          |            |          |
| Application start time:  H H  :  M M  military time<br>Application end time:  H H  :  M M  military time                                                                                                                                                                                                                                                                                                                                                                                                                                                                                                                                                                                                                                                                                                                                                                                                                                                                                                                                                                                                             |          |            |          |
| <input type="checkbox"/> Did not complete device preparation and initial application                                                                                                                                                                                                                                                                                                                                                                                                                                                                                                                                                                                                                                                                                                                                                                                                                                                                                                                                                                                                                                 |          |            |          |
| Please check those steps that you observed. Comments and observations can be made below.                                                                                                                                                                                                                                                                                                                                                                                                                                                                                                                                                                                                                                                                                                                                                                                                                                                                                                                                                                                                                             |          |            |          |
| <input type="checkbox"/> Power on Rad-97 device<br><input type="checkbox"/> Plug in a RD Rainbow SET Series Patient Cable to Patient Cable Port on front of Rad-97 device<br><input type="checkbox"/> Plug in new, unused NomoLine Infant Cannula to round NomoLine Capnography Input Connector on front of Rad-97 device<br><input type="checkbox"/> Attach RD SET Series SpO2 Disposable Sensor to Patient Cable<br><input type="checkbox"/> Apply skin sensor to hand or foot<br><input type="checkbox"/> Ensure sensor wrapped securely but not too tightly and ensure correct alignment of light and detector<br><input type="checkbox"/> Cover sensor to avoid interference from external light sources (as needed)<br><input type="checkbox"/> Insert capnography tubing into nostrils, ensuring that the cannula is not obstructed from collecting CO <sub>2</sub><br><input type="checkbox"/> Secure cannula in place using neonate-safe adhesive as needed<br><input type="checkbox"/> Ensure good quality (square) capnography waveform and high signal quality (perfusion index or PI) on Rad-97 monitor |          |            |          |
| Please provide comments if HCP <u>did not complete</u> device preparation and initial application. Also, if HCP was not able to complete steps correctly, what did they do instead?                                                                                                                                                                                                                                                                                                                                                                                                                                                                                                                                                                                                                                                                                                                                                                                                                                                                                                                                  |          |            |          |
| Did you observe HCP have any challenges or difficulties preparing and/or applying device? What were the problems and how were they resolved?                                                                                                                                                                                                                                                                                                                                                                                                                                                                                                                                                                                                                                                                                                                                                                                                                                                                                                                                                                         |          |            |          |
| Did HCP require any assistance when preparing and/or applying device?<br><input type="checkbox"/> Yes <input type="checkbox"/> No<br>If yes, who assisted HCP?<br>If yes, what kind of assistance was required?                                                                                                                                                                                                                                                                                                                                                                                                                                                                                                                                                                                                                                                                                                                                                                                                                                                                                                      |          |            |          |
| Did you observe any risky situations where mistakes could potentially happen, such as times when HCP almost made a mistake? If yes, please explain.                                                                                                                                                                                                                                                                                                                                                                                                                                                                                                                                                                                                                                                                                                                                                                                                                                                                                                                                                                  |          |            |          |
| Did HCP make any other comments to you or their colleagues related to preparing and/or applying device? If yes, record comments verbatim and provide context as necessary.                                                                                                                                                                                                                                                                                                                                                                                                                                                                                                                                                                                                                                                                                                                                                                                                                                                                                                                                           |          |            |          |
| <b>E. PHASE 2: Ongoing device monitoring and troubleshooting</b>                                                                                                                                                                                                                                                                                                                                                                                                                                                                                                                                                                                                                                                                                                                                                                                                                                                                                                                                                                                                                                                     |          |            |          |
| <b>EarlySense InSight investigational device</b> (if device not used, skip to next section)                                                                                                                                                                                                                                                                                                                                                                                                                                                                                                                                                                                                                                                                                                                                                                                                                                                                                                                                                                                                                          |          |            |          |
| Did you observe HCP have any challenges or difficulties with device monitoring and/or troubleshooting? What were the problems and how were they resolved?                                                                                                                                                                                                                                                                                                                                                                                                                                                                                                                                                                                                                                                                                                                                                                                                                                                                                                                                                            |          |            |          |
| Did HCP do any troubleshooting during ongoing monitoring? If so, please describe what the issues were, how the HCP addressed them and an estimate for how long it took.                                                                                                                                                                                                                                                                                                                                                                                                                                                                                                                                                                                                                                                                                                                                                                                                                                                                                                                                              |          |            |          |
| Issue                                                                                                                                                                                                                                                                                                                                                                                                                                                                                                                                                                                                                                                                                                                                                                                                                                                                                                                                                                                                                                                                                                                | Solution | Start Time | End Time |
|                                                                                                                                                                                                                                                                                                                                                                                                                                                                                                                                                                                                                                                                                                                                                                                                                                                                                                                                                                                                                                                                                                                      |          |            |          |
|                                                                                                                                                                                                                                                                                                                                                                                                                                                                                                                                                                                                                                                                                                                                                                                                                                                                                                                                                                                                                                                                                                                      |          |            |          |
|                                                                                                                                                                                                                                                                                                                                                                                                                                                                                                                                                                                                                                                                                                                                                                                                                                                                                                                                                                                                                                                                                                                      |          |            |          |

| <p>Did HCP require any assistance when monitoring the EarlySense InSight investigational device?<br/> <input type="checkbox"/> Yes   <input type="checkbox"/> No<br/>         If yes, who assisted HCP?<br/>         If yes, what kind of assistance was required?</p>                                                                                                                                                                        |          |            |          |       |          |            |          |  |  |  |  |  |  |  |  |  |  |  |  |  |  |  |  |
|-----------------------------------------------------------------------------------------------------------------------------------------------------------------------------------------------------------------------------------------------------------------------------------------------------------------------------------------------------------------------------------------------------------------------------------------------|----------|------------|----------|-------|----------|------------|----------|--|--|--|--|--|--|--|--|--|--|--|--|--|--|--|--|
| <p>Did you observe any risky situations where mistakes could potentially happen, such as times when HCP almost made a mistake? If yes, please explain.</p>                                                                                                                                                                                                                                                                                    |          |            |          |       |          |            |          |  |  |  |  |  |  |  |  |  |  |  |  |  |  |  |  |
| <p>Did HCP make any other comments to you or their colleagues related to device monitoring and/or troubleshooting? If yes, record comments verbatim and provide context as necessary.</p>                                                                                                                                                                                                                                                     |          |            |          |       |          |            |          |  |  |  |  |  |  |  |  |  |  |  |  |  |  |  |  |
| <p><b>Sibel ANNE investigational device</b> (if device not used, skip to next section)</p>                                                                                                                                                                                                                                                                                                                                                    |          |            |          |       |          |            |          |  |  |  |  |  |  |  |  |  |  |  |  |  |  |  |  |
| <p>Did HCP complete the following steps correctly? Please check those steps that you observed. Comments and observations can be made below.</p> <p><input type="checkbox"/> Open ANNE Stream application to check quality of vital signs waveforms (lines) and perfusion index (PI).<br/> <input type="checkbox"/> Take corrective measures to address signal quality issues (if needed)?</p>                                                 |          |            |          |       |          |            |          |  |  |  |  |  |  |  |  |  |  |  |  |  |  |  |  |
| <p>If signal quality issues needed to be addressed, what corrective measures did they take?</p>                                                                                                                                                                                                                                                                                                                                               |          |            |          |       |          |            |          |  |  |  |  |  |  |  |  |  |  |  |  |  |  |  |  |
| <p>Did you observe HCP have any challenges or difficulties with device monitoring and/or troubleshooting? What were the problems and how were they resolved?</p>                                                                                                                                                                                                                                                                              |          |            |          |       |          |            |          |  |  |  |  |  |  |  |  |  |  |  |  |  |  |  |  |
| <p>Did HCP do any troubleshooting during ongoing monitoring? If so, please describe what the issues were, how the HCP addressed them and an estimate for how long it took.</p>                                                                                                                                                                                                                                                                |          |            |          |       |          |            |          |  |  |  |  |  |  |  |  |  |  |  |  |  |  |  |  |
| <table border="1"> <thead> <tr> <th>Issue</th> <th>Solution</th> <th>Start Time</th> <th>End Time</th> </tr> </thead> <tbody> <tr> <td> </td> <td> </td> <td> </td> <td> </td> </tr> <tr> <td> </td> <td> </td> <td> </td> <td> </td> </tr> <tr> <td> </td> <td> </td> <td> </td> <td> </td> </tr> <tr> <td> </td> <td> </td> <td> </td> <td> </td> </tr> </tbody> </table>                                                                   |          |            |          | Issue | Solution | Start Time | End Time |  |  |  |  |  |  |  |  |  |  |  |  |  |  |  |  |
| Issue                                                                                                                                                                                                                                                                                                                                                                                                                                         | Solution | Start Time | End Time |       |          |            |          |  |  |  |  |  |  |  |  |  |  |  |  |  |  |  |  |
|                                                                                                                                                                                                                                                                                                                                                                                                                                               |          |            |          |       |          |            |          |  |  |  |  |  |  |  |  |  |  |  |  |  |  |  |  |
|                                                                                                                                                                                                                                                                                                                                                                                                                                               |          |            |          |       |          |            |          |  |  |  |  |  |  |  |  |  |  |  |  |  |  |  |  |
|                                                                                                                                                                                                                                                                                                                                                                                                                                               |          |            |          |       |          |            |          |  |  |  |  |  |  |  |  |  |  |  |  |  |  |  |  |
|                                                                                                                                                                                                                                                                                                                                                                                                                                               |          |            |          |       |          |            |          |  |  |  |  |  |  |  |  |  |  |  |  |  |  |  |  |
| <p>Did HCP require any assistance when monitoring the Sibel ANNE investigational device?<br/> <input type="checkbox"/> Yes   <input type="checkbox"/> No<br/>         If yes, who assisted HCP?<br/>         If yes, what kind of assistance was required?</p>                                                                                                                                                                                |          |            |          |       |          |            |          |  |  |  |  |  |  |  |  |  |  |  |  |  |  |  |  |
| <p>Did you observe any risky situations where mistakes could potentially happen, such as times when HCP almost made a mistake? If yes, please explain.</p>                                                                                                                                                                                                                                                                                    |          |            |          |       |          |            |          |  |  |  |  |  |  |  |  |  |  |  |  |  |  |  |  |
| <p>Did HCP make any other comments to you or their colleagues related to device monitoring and/or troubleshooting? If yes, record comments verbatim and provide context as necessary.</p>                                                                                                                                                                                                                                                     |          |            |          |       |          |            |          |  |  |  |  |  |  |  |  |  |  |  |  |  |  |  |  |
| <p><b>Masimo Rad-97 reference device</b> (if device not used, skip to next section)</p>                                                                                                                                                                                                                                                                                                                                                       |          |            |          |       |          |            |          |  |  |  |  |  |  |  |  |  |  |  |  |  |  |  |  |
| <p>Did HCP complete the following steps correctly? Please check those steps that you observed. Comments and observations can be made below.</p> <p><input type="checkbox"/> Confirm adequate signal quality (PI) for skin sensor<br/> <input type="checkbox"/> Confirm adequate signal quality (waveform) for capnography tube</p>                                                                                                            |          |            |          |       |          |            |          |  |  |  |  |  |  |  |  |  |  |  |  |  |  |  |  |
| <p>If signal quality issues needed to be addressed, what corrective measures did they take?</p> <p><input type="checkbox"/> Confirm placement of skin sensor<br/> <input type="checkbox"/> Confirm placement of cannula<br/> <input type="checkbox"/> Confirm connection of Patient Cable to Patient Cable port<br/> <input type="checkbox"/> Confirm connection of Capnography Input Connector<br/> <input type="checkbox"/> Other _____</p> |          |            |          |       |          |            |          |  |  |  |  |  |  |  |  |  |  |  |  |  |  |  |  |

|                                                                                                                                                                                                                                                                                                                                                                                                                                                                                                                                                                                                                                                                                                                                                                                                                                                                                                                                   |          |            |          |
|-----------------------------------------------------------------------------------------------------------------------------------------------------------------------------------------------------------------------------------------------------------------------------------------------------------------------------------------------------------------------------------------------------------------------------------------------------------------------------------------------------------------------------------------------------------------------------------------------------------------------------------------------------------------------------------------------------------------------------------------------------------------------------------------------------------------------------------------------------------------------------------------------------------------------------------|----------|------------|----------|
| Did you observe HCP have any challenges or difficulties with device monitoring and/or troubleshooting? What were the problems and how were they resolved?                                                                                                                                                                                                                                                                                                                                                                                                                                                                                                                                                                                                                                                                                                                                                                         |          |            |          |
| Did HCP do any troubleshooting during ongoing monitoring? If so, please describe what the issues were, how the HCP addressed them and an estimate for how long it took.                                                                                                                                                                                                                                                                                                                                                                                                                                                                                                                                                                                                                                                                                                                                                           |          |            |          |
| Issue                                                                                                                                                                                                                                                                                                                                                                                                                                                                                                                                                                                                                                                                                                                                                                                                                                                                                                                             | Solution | Start Time | End Time |
|                                                                                                                                                                                                                                                                                                                                                                                                                                                                                                                                                                                                                                                                                                                                                                                                                                                                                                                                   |          |            |          |
|                                                                                                                                                                                                                                                                                                                                                                                                                                                                                                                                                                                                                                                                                                                                                                                                                                                                                                                                   |          |            |          |
|                                                                                                                                                                                                                                                                                                                                                                                                                                                                                                                                                                                                                                                                                                                                                                                                                                                                                                                                   |          |            |          |
| Did HCP require any assistance when monitoring the Masimo Rad-97 reference device?<br><input type="checkbox"/> Yes <input type="checkbox"/> No<br>If yes, who assisted HCP?<br>If yes, what kind of assistance was required?                                                                                                                                                                                                                                                                                                                                                                                                                                                                                                                                                                                                                                                                                                      |          |            |          |
| Did you observe any risky situations where mistakes could potentially happen, such as times when HCP almost made a mistake? If yes, please explain.                                                                                                                                                                                                                                                                                                                                                                                                                                                                                                                                                                                                                                                                                                                                                                               |          |            |          |
| Did HCP make any other comments to you or their colleagues related to device monitoring and/or troubleshooting? If yes, record comments verbatim and provide context as necessary.                                                                                                                                                                                                                                                                                                                                                                                                                                                                                                                                                                                                                                                                                                                                                |          |            |          |
| <b>F. PHASE 3: Device disconnection, removal, and cleaning</b>                                                                                                                                                                                                                                                                                                                                                                                                                                                                                                                                                                                                                                                                                                                                                                                                                                                                    |          |            |          |
| <b>EarlySense InSight investigational device</b> (if device not used, skip to next section)                                                                                                                                                                                                                                                                                                                                                                                                                                                                                                                                                                                                                                                                                                                                                                                                                                       |          |            |          |
| Did HCP discharge neonate from EarlySense laptop/CDS correctly? If not, what did HCP do instead?                                                                                                                                                                                                                                                                                                                                                                                                                                                                                                                                                                                                                                                                                                                                                                                                                                  |          |            |          |
| Did you observe HCP have any challenges or difficulties with device disconnection, removal, and/or cleaning? What were the problems and how were they resolved?                                                                                                                                                                                                                                                                                                                                                                                                                                                                                                                                                                                                                                                                                                                                                                   |          |            |          |
| Did the HCP require any assistance with device disconnection, removal, and/or cleaning?<br><input type="checkbox"/> Yes <input type="checkbox"/> No<br>If yes, who assisted the HCP?<br>If yes, what kind of assistance was required?                                                                                                                                                                                                                                                                                                                                                                                                                                                                                                                                                                                                                                                                                             |          |            |          |
| Did you observe any risky situations where mistakes could potentially happen, such as times when HCP almost made a mistake? If yes, please explain.                                                                                                                                                                                                                                                                                                                                                                                                                                                                                                                                                                                                                                                                                                                                                                               |          |            |          |
| Did HCP make any other comments to you or their colleagues related to device disconnection, removal, and/or cleaning? If yes, record comments verbatim and provide context as necessary.                                                                                                                                                                                                                                                                                                                                                                                                                                                                                                                                                                                                                                                                                                                                          |          |            |          |
| <b>Sibel ANNE investigational device</b> (if device not used, skip to next section)                                                                                                                                                                                                                                                                                                                                                                                                                                                                                                                                                                                                                                                                                                                                                                                                                                               |          |            |          |
| Please check those steps that you observed. Comments and observations can be made below.                                                                                                                                                                                                                                                                                                                                                                                                                                                                                                                                                                                                                                                                                                                                                                                                                                          |          |            |          |
| <input type="checkbox"/> Disconnect chest and limb sensors from Devices tab of ANNE Stream application<br><input type="checkbox"/> Close ANNE Stream application<br><input type="checkbox"/> Close ANNE Sync application by swiping up on application<br><input type="checkbox"/> Re-open ANNE Connect application<br><input type="checkbox"/> Disconnect limb sensor first<br><input type="checkbox"/> Disconnect chest sensor<br><input type="checkbox"/> End session by selecting “End Session” button from ANNE Connect application<br><input type="checkbox"/> Sanitize hands according to study site infection control policy<br><input type="checkbox"/> Remove chest sensor by gently pulling off, away from the neonate, on one corner<br><input type="checkbox"/> Gently remove any residual adhesive using a saline cleaning wipe<br><input type="checkbox"/> Unfasten Velcro button from strap and remove limb sensor |          |            |          |

|                                                                                                                                                                                                                                                                                                                                                                                                                                                                                                                                                                                                                |
|----------------------------------------------------------------------------------------------------------------------------------------------------------------------------------------------------------------------------------------------------------------------------------------------------------------------------------------------------------------------------------------------------------------------------------------------------------------------------------------------------------------------------------------------------------------------------------------------------------------|
| <input type="checkbox"/> Dispose of used Velcro strap<br><input type="checkbox"/> Clean chest and limb sensors, wipe both sides<br><input type="checkbox"/> Dispose used cleaning wipe                                                                                                                                                                                                                                                                                                                                                                                                                         |
| If HCP was not able to complete steps correctly and <u>in order</u> , what did they do instead?                                                                                                                                                                                                                                                                                                                                                                                                                                                                                                                |
| Did you observe HCP have any challenges or difficulties with device disconnection, removal, and/or cleaning? What were the problems and how were they resolved?                                                                                                                                                                                                                                                                                                                                                                                                                                                |
| Did the HCP require any assistance with device disconnection, removal, and/or cleaning?<br><input type="checkbox"/> Yes <input type="checkbox"/> No<br>If yes, who assisted the HCP?<br>If yes, what kind of assistance was required?                                                                                                                                                                                                                                                                                                                                                                          |
| Did you observe any risky situations where mistakes could potentially happen, such as times when HCP almost made a mistake? If yes, please explain.                                                                                                                                                                                                                                                                                                                                                                                                                                                            |
| Did HCP make any other comments to you or their colleagues related to device disconnection, removal, and/or cleaning? If yes, record comments verbatim and provide context as necessary.                                                                                                                                                                                                                                                                                                                                                                                                                       |
| <b>Masimo Rad-97 reference device</b> (if device not used, skip to next section)                                                                                                                                                                                                                                                                                                                                                                                                                                                                                                                               |
| Did HCP complete the following steps correctly? Please check those steps that you observed. Comments and observations can be made below.<br><input type="checkbox"/> Remove adhesive (if present) and capnography tube gently from neonate<br><input type="checkbox"/> Carefully remove skin sensor from neonate<br><input type="checkbox"/> Dispose of single use capnography tube and disposable skin sensor<br><input type="checkbox"/> Unplug capnography tube and patient cable from Rad-97<br><input type="checkbox"/> Unplug skin sensor from patient cable<br><input type="checkbox"/> Turn off Rad-97 |
| If HCP was not able to complete steps correctly, what did they do instead?                                                                                                                                                                                                                                                                                                                                                                                                                                                                                                                                     |
| Did you observe HCP have any challenges or difficulties with device disconnection, removal, and/or cleaning? What were the problems and how were they resolved?                                                                                                                                                                                                                                                                                                                                                                                                                                                |
| Did the HCP require any assistance with device disconnection, removal, and/or cleaning?<br><input type="checkbox"/> Yes <input type="checkbox"/> No<br>If yes, who assisted the HCP?<br>If yes, what kind of assistance was required?                                                                                                                                                                                                                                                                                                                                                                          |
| Did you observe any risky situations where mistakes could potentially happen, such as times when HCP almost made a mistake? If yes, please explain.                                                                                                                                                                                                                                                                                                                                                                                                                                                            |
| Did HCP make any other comments to you or their colleagues related to device disconnection, removal, and/or cleaning? If yes, record comments verbatim and provide context as necessary.                                                                                                                                                                                                                                                                                                                                                                                                                       |

**Please note below any further comments that may have not already been covered in above sections. In particular, if you have any observations comparing the HCP's use of the different devices, if applicable.**
